# Supplementary material for: Role for ovarian hormones in purinoceptor-dependent natriuresis
Source: PubMed Central journal article supplement (PMC7490965; doi:10.1186/s13293-020-00329-0), 2020-09-14

## Data Supplement

### Role for ovarian hormones in purinoceptor-dependent natriuresis

Eman Y. Gohar, Malgorzata Kasztan, Shali Zhang, Edward W. Inscho, David M. Pollock

Division of Nephrology, Department of Medicine, University of Alabama at Birmingham,

Birmingham, AL

**Supplemental Figure 1. Determination of the specificity of anti-P2Y<sub>2</sub> receptor and anti-P2Y<sub>4</sub> receptor antibodies by immunoblotting.** Representative Western blots for inner medullary homogenates from male, ovary-intact female and OVX Sprague Dawley rats incubated with anti-P2Y<sub>2</sub> receptor antibody (A) or anti-P2Y<sub>4</sub> receptor antibody (APR-010, APR-006, respectively, Alomone Labs) in the presence (right) and absence (left) of the respective blocking peptide.

Supplemental Figure 1.

**A**

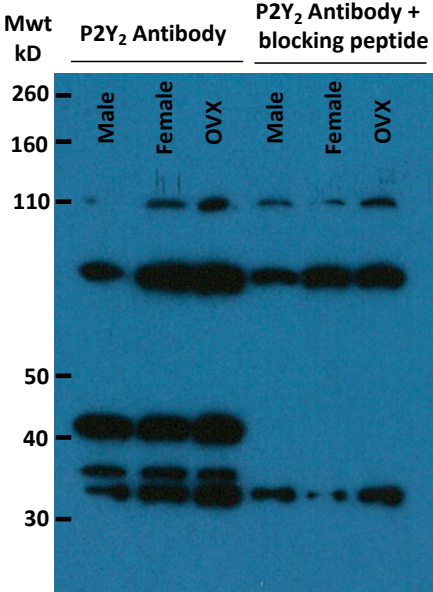

**B**

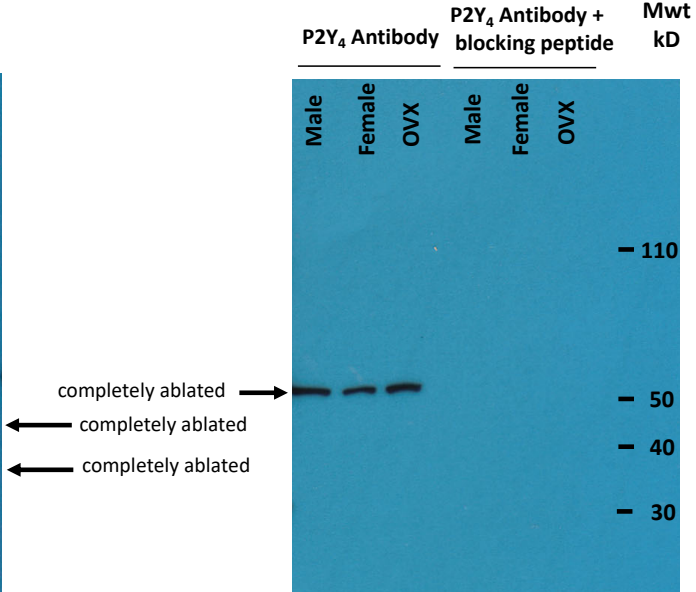

Supplement: 13293_2020_329_MOESM1_ESM.pdf [file 13293_2020_329_MOESM1_ESM.pdf]
